# Supplementary material
Source: PubMed Central journal article supplement (PMC4955059)
Supplement: thnov06p1603s1.pdf [file thnov06p1603s1.pdf]

## **Holographic Assessment of Lymphoma Tissue (HALT) for Global Oncology Field Applications**

Divya Pathania<sup>#1,2</sup>, Hyungsoon Im<sup>#1,2</sup>, Aoife Kilcoyne<sup>1,2</sup>, Aliyah R. Sohani<sup>3</sup>, Liubov Fexon<sup>1</sup>, Misha Pivovarov<sup>1,2</sup>, Jeremy S. Abramson<sup>4,5,6</sup>, Thomas C. Randall<sup>5,7,8</sup>, Bruce A. Chabner<sup>5,6</sup>, Ralph Weissleder<sup>1,2,9\*</sup>, Hakho Lee<sup>1,2\*</sup>, Cesar M. Castro<sup>1,5,6\*</sup>

#These authors contributed equally to the paper

<sup>1</sup> Center for Systems Biology, Massachusetts General Hospital, Harvard Medical School, Boston, MA 02114

<sup>2</sup> Department of Radiology, Massachusetts General Hospital, Harvard Medical School, Boston, MA 02114

<sup>3</sup> Department of Pathology, Massachusetts General Hospital, Boston, MA, 02114

<sup>4</sup> Center for Lymphoma, Massachusetts General Hospital, Boston, MA, 02114

<sup>5</sup> Massachusetts General Hospital Cancer Center, Boston, MA 02114

<sup>6</sup> Department of Medicine, Massachusetts General Hospital, Harvard Medical School, Boston, MA 02114

<sup>7</sup> Global Oncology Initiative, Dana-Farber / Harvard Cancer Center, Boston, MA, 02115

<sup>8</sup> Department of Obstetrics, Gynecology and Reproductive Biology, Massachusetts General Hospital, Boston, MA 02114

<sup>9</sup> Department of Systems Biology, Harvard Medical School, Boston, MA 02115

\* Corresponding authors:

C. M. Castro, MD; H. Lee, PhD; R. Weissleder, MD, PhD

Center for Systems Biology

Massachusetts General Hospital

185 Cambridge St, CPZN 5206, Boston, MA 02114

617-726-8226 (Telephone) / 617-643-6133 (Fax)

castro.cesar@mgh.harvard.edu

hlee@mgh.harvard.edu

rweissleder@mgh.harvard.edu

**Keywords:** Cancer diagnostics, Smartphone testing, Point-of-care diagnostics, global oncology

**Table S1. Hardware and assay cost for cellular detection and profiling**

|                   | <b>Name</b>                                                                                                                 | <b>Current Cost</b>                                                                 | <b>Current cost per single assay*</b> |        |
|-------------------|-----------------------------------------------------------------------------------------------------------------------------|-------------------------------------------------------------------------------------|---------------------------------------|--------|
| <b>Antibodies</b> | Purified Mouse IgG1, $\kappa$ Isotype Control                                                                               | \$110 (500 $\mu$ g)                                                                 | \$0.055                               |        |
|                   | Purified Mouse IgG2a, $\kappa$ Isotype Control                                                                              | \$110 (500 $\mu$ g)                                                                 | \$0.055                               |        |
|                   | Purified Mouse IgG2b, $\kappa$ Isotype Control                                                                              | \$110 (500 $\mu$ g)                                                                 | \$0.055                               |        |
|                   | Purified anti-human Ig light chain $\kappa$ Antibody                                                                        | \$85 (100 $\mu$ g)                                                                  | \$0.21                                |        |
|                   | Purified anti-human Ig light Chain, $\lambda$ Antibody                                                                      | \$126 (500 $\mu$ g)                                                                 | \$0.063                               |        |
|                   | Purified anti-human CD3 Antibody                                                                                            | \$50 (100 $\mu$ g)                                                                  | \$0.125                               |        |
|                   | Purified anti-human CD5 Antibody                                                                                            | \$85 (100 $\mu$ g)                                                                  | \$0.21                                |        |
|                   | Purified anti-human CD10 Antibody                                                                                           | \$95 (100 $\mu$ g)                                                                  | \$0.24                                |        |
|                   | Purified anti-human CD15 (SSEA-1) Antibody                                                                                  | \$85 (100 $\mu$ g)                                                                  | \$0.21                                |        |
|                   | Purified anti-human CD19 Antibody                                                                                           | \$50 (100 $\mu$ g)                                                                  | \$0.125                               |        |
|                   | Purified anti-human CD20 Antibody                                                                                           | \$65 (100 $\mu$ g)                                                                  | \$0.162                               |        |
|                   | <b>Beads</b>                                                                                                                | Dynabeads                                                                           | \$640 (5mL)                           | \$3.52 |
|                   | <b>Others</b>                                                                                                               | misc. reagents (eg. buffer solutions, tubes)                                        |                                       | \$0.34 |
| <b>Hardware</b>   | iPhone 4S                                                                                                                   | \$145                                                                               |                                       |        |
|                   | Snap-on module                                                                                                              | \$6 (LED, switch, battery)<br>\$5 (Plastic mount)<br>\$20 (pin hole)<br>\$25 (lens) |                                       |        |
|                   | Snap-on module cost: \$56; single assay cost: \$5                                                                           |                                                                                     |                                       |        |
|                   | *The current cost figures are based on commercial products for end-users and would decrease with bulk orders upon scale up. |                                                                                     |                                       |        |

**Table S2. List of antibodies used in this study**

| <b>Antibody</b>                                                                 | <b>Clone</b> | <b>Catalog no.</b> | <b>Vendor</b>             |
|---------------------------------------------------------------------------------|--------------|--------------------|---------------------------|
| Purified Mouse IgG1, $\kappa$ Isotype Control                                   | MOPC-21      | 400102             | Biologend                 |
| Purified Mouse IgG2a, $\kappa$ Isotype Control                                  | MOPC-173     | 400202             | Biologend                 |
| Purified Mouse IgG2b, $\kappa$ Isotype Control                                  | MG2b-57      | 401202             | Biologend                 |
| Purified anti-human Ig light chain $\kappa$ Antibody                            | MHK-49       | 316502             | Biologend                 |
| Purified anti-human Ig light Chain, $\lambda$ Antibody                          | JDC-12       | 555793             | BD Biosciences            |
| Purified anti-human CD3 Antibody                                                | OKT3         | 317302             | Biologend                 |
| Purified anti-human CD5 Antibody                                                | UCHT2        | 300602             | Biologend                 |
| Purified anti-human CD10 Antibody                                               | HI10a        | 312202             | Biologend                 |
| Purified anti-human CD15 (SSEA-1) Antibody                                      | W6D3         | 323002             | Biologend                 |
| Purified anti-human CD19 Antibody                                               | HIB19        | 302202             | Biologend                 |
| Purified anti-human CD20 Antibody                                               | 2H7          | 302302             | Biologend                 |
| Anti-mouse IgG (H+L), F(ab') <sub>2</sub> Fragment (Alexa Fluor® 647 Conjugate) |              | 4410               | Cell Signaling Technology |

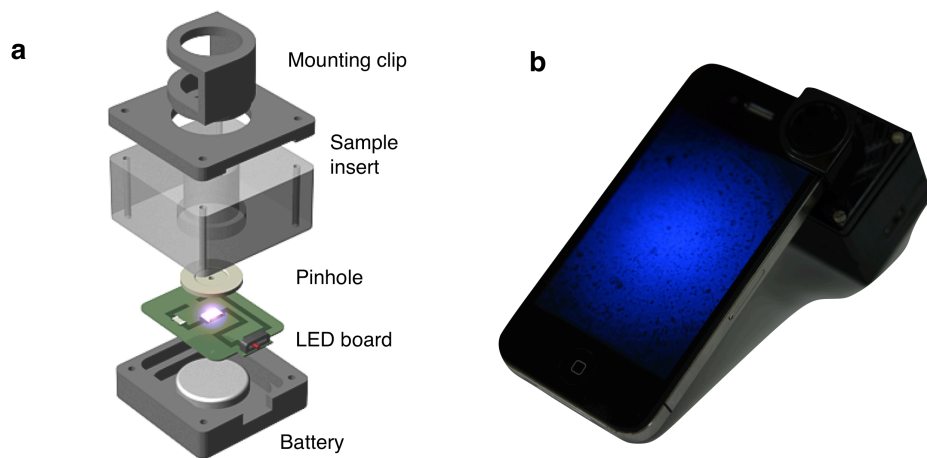

**Figure S1. (a)** The snap-on module for a smartphone consists of an LED powered by a coin battery, a pinhole for uniform illumination with partial coherence, and a sample mount. **(b)** Photograph of the snap-on module attached on the iPhone 4S.

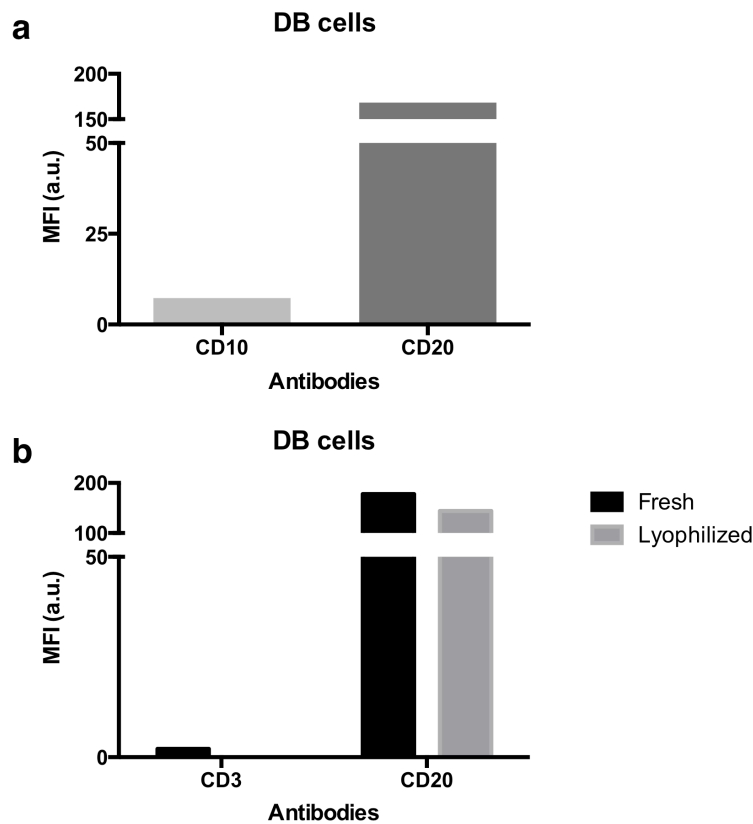

**Figure S2. (a)** DB cells were profiled for CD markers (CD10 and CD20) using flow cytometry. CD20 exhibited increased expression in DB cells as compared to CD10. **(b)** Using the smartphone based system imparts portability to our detection system. In order to increase the portability and shelf-life of our system we tested the system with lyophilized antibodies. Lyophilized antibodies (CD3 and CD20) were tested and compared with parent solution antibodies after 2 weeks of storage at 4°C by flow cytometry and exhibited similar activity as the original antibodies.
